# Supplementary material for: New models and online calculator for predicting non-sentinel lymph node status in sentinel lymph node positive breast cancer patients
Source: PubMed Central journal article supplement (PMC2311316; doi:10.1186/1471-2407-8-66), 2008-03-04
Supplement: 1471-2407-8-66-S1.pdf [file 1471-2407-8-66-S1.pdf]

Stanford/Bay Area SLN Database 1996-2002  
n=1040

Invasive Carcinoma n=784

Infiltrating Ductal n=640  
Invasive Lobular n=83  
Mixed (Inv.Ductal/Lobular) n=31  
Tubular n=16  
Mucinous n=10  
Medullary n=4

Excluded n=256

Ductal Carcinoma *In Situ* n=50  
SLN Not Identified (2 DCIS) n=91  
ALN Dissection Not Performed n=113  
LN Pathology Incomplete n=4

Negative SLN Biopsy  
n=499

Positive SLN Biopsy  
n=285

Negative NSLN(s)  
n=184 (64.6%)

Positive NSLN(s)  
n=101 (35.4%)
