# Supplementary material for: New models and online calculator for predicting non-sentinel lymph node status in sentinel lymph node positive breast cancer patients
Source: PubMed Central journal article supplement (PMC2311316; doi:10.1186/1471-2407-8-66), 2008-03-04

# CART (n=171)

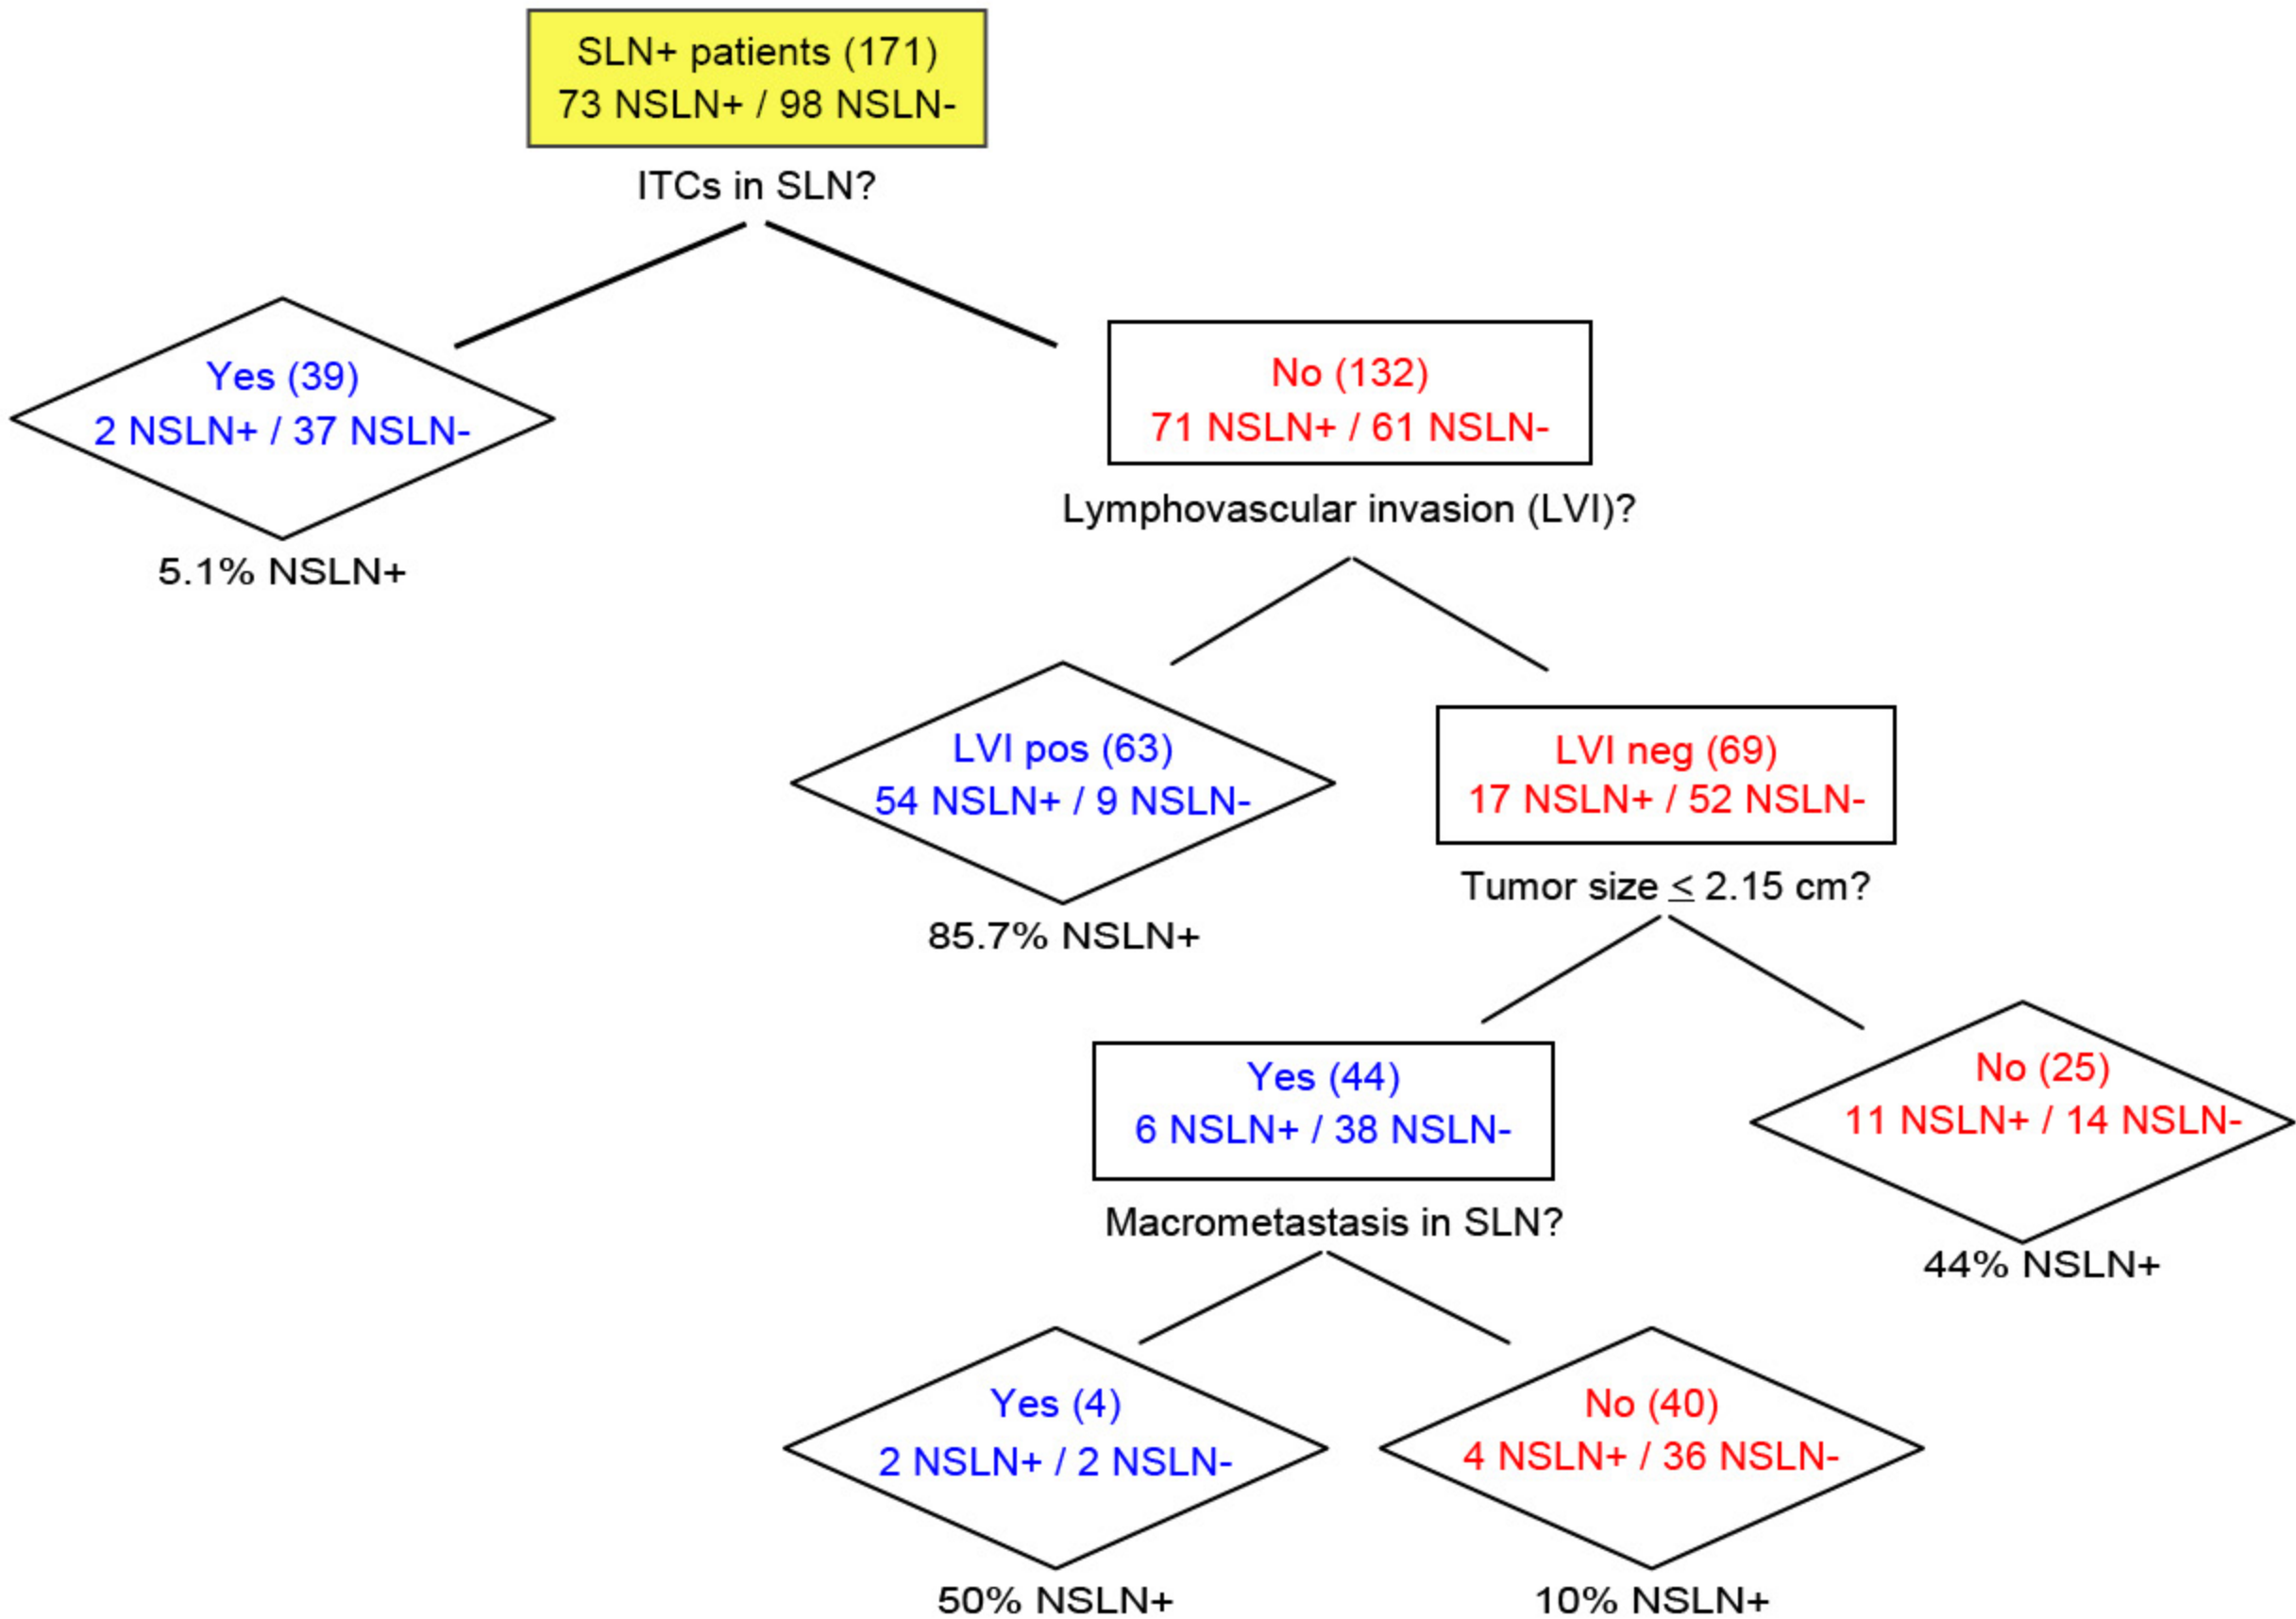

Supplement: 1471-2407-8-66-S5.pdf [file 1471-2407-8-66-S5.pdf]
